# Supplementary material for: Sympatric and allopatric niche shift of endemic Gypsophila (Caryophyllaceae) taxa in the Iberian Peninsula
Source: PLoS One. 2018 Nov 7;13(11):e0206043. doi: 10.1371/journal.pone.0206043 (PMC6221283; doi:10.1371/journal.pone.0206043)
Supplement: S2 Table — (CSV) [file pone.0206043.s002.csv]

lon	lat	suit_stru_GM	suit_stru_mid	suit_stru_cur
-1.0911369841	39.2388209947	0.05802	0.08304	0.25036
-3.6412006339	40.0588108039	0.00041	0.00353	0.10038
-1.5111499622	39.5188222028	0.01656	0.1117	0.3854
-3.42	40.27	0.00032	0.00396	0.07228
-2.15385	37.87482	5E-05	0.00335	0.01507
-2.29184	37.08592	0.00292	0.05234	0.11532
-2.04392	37.12085	0.01348	0.09398	0.13181
-2.00298	37.31548	0.0113	0.08564	0.15828
-2.00685	37.12533	0.02224	0.09732	0.1201
-0.87555	38.60359	0.00772	0.01742	0.06107
-1.08824	39.23797	0.05802	0.08304	0.25036
-0.87288	38.69364	0.0066	0.02015	0.08492
-0.87555	38.60359	0.00772	0.01742	0.06107
-1.08824	39.23797	0.05802	0.08304	0.25036
-1.9311199791	37.1787747165	0.01963	0.08121	0.10832
-1.0911354792	39.1488192475	0.04085	0.07323	0.27665
-1.8851	37.35327	0.00497	0.05615	0.11844
-2.05197	37.3217	0.00721	0.08589	0.14491
-2.30221	37.08153	0.00292	0.05234	0.11532
-2.05728	37.12711	0.00765	0.08619	0.13733
-1.86026	38.97496	0.0018	0.01814	0.11819
-2.0111327223	37.88878643	0.00018	0.01889	0.03373
-1.8711314794	37.9787894622	0.00016	0.02198	0.03981
-1.0911354792	39.1488192475	0.04085	0.07323	0.27665
-2.47118285	40.3288285212	0.00045	0.01105	0.15962
-2.1611229547	37.0887708738	0.00723	0.08255	0.14889
-3.6411974333	39.8788072274	0.00016	0.00164	0.05384
-3.0611961085	40.4288243796	0.00136	0.01775	0.23257
-1.09068	39.14791	0.04085	0.07323	0.27665
-2.08617	37.08864	0.00975	0.08867	0.13698
-2.05661	37.12674	0.00765	0.08619	0.13733
-1.09	39.26	0.06114	0.12043	0.32365
-3.0611456268	37.4487680466	1E-05	5E-05	0.00101
-3.4011563445	37.7187693195	0	1E-05	0.00024
-3.4111978339	40.1488150281	0.00022	0.00274	0.0712
-3.0611912727	40.1588189055	0.00052	0.00661	0.13533
-1.5011477276	39.3988199493	0.0367	0.17173	0.45285
-0.87555	38.60359	0.00772	0.01742	0.06107
-3.2911957058	40.1588164911	0.00023	0.00369	0.07651
-3.411201063	40.3288186592	0.00029	0.00595	0.08294
-3.2911957058	40.1588164911	0.00023	0.00369	0.07651
-0.88608	38.24335	0.00266	0.00642	0.01765
-3.76232	40.06207	0.0004	0.00346	0.12176
-2.6011398106	37.6287758508	0.0001	0.00216	0.01631
-3.2811555467	37.808772134	1E-05	7E-05	0.0023
-3.6512024348	40.148812499	0.0003	0.00401	0.11205
-3.6512024348	40.148812499	0.0003	0.00401	0.11205
-3.2911957058	40.1588164911	0.00023	0.00369	0.07651
-1.0911354792	39.1488192475	0.04085	0.07323	0.27665
-2.0769	37.87417	0.0001	0.0101	0.02479
-1.08824	39.23797	0.05802	0.08304	0.25036
-1.31772	39.33161	0.05298	0.18205	0.41686
-0.87555	38.60359	0.00772	0.01742	0.06107
-2.7111732966	39.518809857	8E-05	0.00317	0.02562
-2.0411220744	37.1787736196	0.00533	0.05416	0.12408
-1.8211178807	37.178775812	0.02511	0.06389	0.08264
-0.78279	37.88101	0.00528	0.00504	0.01616
-0.87288	38.69364	0.0066	0.02015	0.08492
-2.11908	37.29015	0.00525	0.08362	0.14572
-2.09851	37.07683	0.00541	0.07881	0.11604
-2.72207	40.1462	0.00022	0.00365	0.07618
-1.08824	39.23797	0.05802	0.08304	0.25036
-0.87555	38.60359	0.00772	0.01742	0.06107
-2.1	37.13	0.00556	68	0.1062
-2.09862	37.07772	0.00541	0.07881	0.11604
-2.5911725361	39.6088128631	9E-05	0.00337	0.03831
-3.4011563445	37.7187693195	0	1E-05	0.00024
-1.041135833	39.2288213065	0.05261	0.09585	0.31768
-3.2811555467	37.808772134	1E-05	7E-05	0.0023
-3.6411974333	39.8788072274	0.00016	0.00164	0.05384
-1.08824	39.23797	0.05802	0.08304	0.25036
-1.09311	39.05785	0.02917	0.07112	0.21126
-1.00028	38.24536	0.00191	0.01049	0.03938
-1.87545	37.35912	0.00497	0.05615	0.11844
-2.29246	37.08419	0.00292	0.05234	0.11532
-1.84819	37.16314	0.02073	0.07715	0.08681
-2.30312	37.08247	0.00292	0.05234	0.11532
-2.05856	37.12748	0.00765	0.08619	0.13733
-2.5911803994	40.0588218049	6E-05	0.00264	0.03796
-2.2711250416	37.0887697756	0.00292	0.05234	0.11532
-2.4911406038	37.808780155	4E-05	0.00097	0.00785
-3.5211919686	39.6988049417	0.0001	0.00176	0.0363
-3.6411974333	39.8788072274	0.00016	0.00164	0.05384
-3.5312033698	40.3288173927	0.00029	0.00436	0.08215
-2.0411206744	37.0887720704	0.01482	0.09492	0.12602
-2.04096	37.3167	0.00721	0.08589	0.14491
-2.0514	37.12097	0.01348	0.09398	0.13181
-2.05022	37.10698	0.01482	0.09492	0.12602
-1.00028	38.24536	0.00191	0.01049	0.03938
-1.08824	39.23797	0.05802	0.08304	0.25036
-2.0411220744	37.1787736196	0.00533	0.05416	0.12408
-3.5311937428	39.788806606	0.00016	0.00174	0.04133
-3.6412006339	40.0588108039	0.00041	0.00353	0.10038
-3.6512024348	40.148812499	0.0003	0.00401	0.11205
-3.0612059476	40.9688355487	0.0022	0.09	0.41971
-2.05616	37.12669	0.00765	0.08619	0.13733
-1.98867	37.30254	0.0113	0.08564	0.15828
-2.08232	37.09084	0.00975	0.08867	0.13698
-0.8811222916	38.5988108553	0.00772	0.01742	0.06107
-3.73	40.06	0.0004	0.00346	0.12176
-2.00955	37.31174	0.0113	0.08564	0.15828
-2.30308	37.08285	0.00292	0.05234	0.11532
-2.30289	37.08255	0.00292	0.05234	0.11532
-3.0611880793	39.978815297	0.00017	0.00213	0.06557
-3.5312033698	40.3288173927	0.00029	0.00436	0.08215
-0.8811222916	38.5988108553	0.00772	0.01742	0.06107
-3.0612059476	40.9688355487	0.0022	0.09	0.41971
-0.87288	38.69364	0.0066	0.02015	0.08492
-0.87555	38.60359	0.00772	0.01742	0.06107
-0.87288	38.69364	0.0066	0.02015	0.08492
-1.6	39.56	0.0069	0.06892	0.28853
-0.87555	38.60359	0.00772	0.01742	0.06107
-0.87288	38.69364	0.0066	0.02015	0.08492
-3.73	40.06	0.0004	0.00346	0.12176
-2.8211850355	40.068819607	0.0002	0.00317	0.0662
-2.7111877027	40.3388262169	0.00082	0.01787	0.23581
-1.9311227908	37.358777842	0.01183	0.07075	0.12238
-1.9511234863	37.3787779915	0.0084	0.0636	0.11065
-3.6411974333	39.8788072274	0.00016	0.00164	0.05384
-1.88313	37.35402	0.00497	0.05615	0.11844
-1.9211317977	37.9387882364	0.0002	0.02923	0.05047
-2.0211327537	37.8787861496	0.00017	0.01253	0.03293
-2.7111829045	40.0688207551	8E-05	0.00256	0.05185
-3.4111978339	40.1488150281	0.00022	0.00274	0.0712
-3.4111978339	40.1488150281	0.00022	0.00274	0.0712
-3.411201063	40.3288186592	0.00029	0.00595	0.08294
-0.87555	38.60359	0.00772	0.01742	0.06107
-2.08661	37.08857	0.00975	0.08867	0.13698
-3.66	40.16	0.0003	0.00401	0.11205
-1.09068	39.14791	0.04085	0.07323	0.27665
-2.94	40.52	0.00078	0.02118	0.23766
-3.061189673	40.0688170972	0.00021	0.00403	0.09209
-1.0511360298	39.2288212053	0.05261	0.09585	0.31768
-1.5411459758	39.2488166178	0.01057	0.08495	0.24795
-2.6011383764	37.5387742673	8E-05	0.00183	0.01114
-3.6512056725	40.3288161244	0.00051	0.0068	0.12457
-3.5312033698	40.3288173927	0.00029	0.00436	0.08215
-2.29272	37.08452	0.00292	0.05234	0.11532
-1.08579	39.32803	0.04863	0.15492	0.43635
-1.1011373484	39.2488210881	0.0526	0.11998	0.37013
-0.92	38.64	0.00614	0.02119	0.07937
-2.0095	37.31222	0.0113	0.08564	0.15828
-2.00091	37.31921	0.0113	0.08564	0.15828
-1.89635	37.35987	0.00622	0.05937	0.11159
-2.08164	37.09231	0.00975	0.08867	0.13698
-2.08771	37.08823	0.00975	0.08867	0.13698
-2.3611680828	39.608815242	0.0001	0.00366	0.03412
-2.2711250416	37.0887697756	0.00292	0.05234	0.11532
-2.0411206744	37.0887720704	0.01482	0.09492	0.12602
-3.0611514024	37.8087743745	1E-05	7E-05	0.00143
-2.8212012653	40.9688380865	0.00224	0.09835	0.40268
-1.0011189753	38.2488031242	0.00164	0.01232	0.04198
-2.0411220744	37.1787736196	0.00533	0.05416	0.12408
-3.5312001364	40.1488137644	0.00031	0.00355	0.1023
-3.5312033698	40.3288173927	0.00029	0.00436	0.08215
-3.5312033698	40.3288173927	0.00029	0.00436	0.08215
-3.2911941019	40.0688146855	0.00036	0.00442	0.09864
-3.2911957058	40.1588164911	0.00023	0.00369	0.07651
-1.08824	39.23797	0.05802	0.08304	0.25036
-0.87555	38.60359	0.00772	0.01742	0.06107
-1.0711362559	39.2188208083	0.05802	0.08304	0.25036
-0.8911166682	38.2388040384	0.00232	0.00766	0.03284
-0.87288	38.69364	0.0066	0.02015	0.08492
-3.5312049958	40.4188192191	0.00025	0.00414	0.09166
-3.1811935875	40.1588176466	0.00043	0.00445	0.11611
-1.0911354792	39.1488192475	0.04085	0.07323	0.27665
-0.8811222916	38.5988108553	0.00772	0.01742	0.06107
-2.08255	37.08996	0.00975	0.08867	0.13698
-2.02308	37.13909	0.01348	0.09398	0.13181
-0.8911231395	38.6388115094	0.00614	0.02119	0.07937
-2.0411220744	37.1787736196	0.00533	0.05416	0.12408
-3.7712096013	40.4188166781	0.00086	0.02502	0.20809
-1.89412	37.37129	0.00858	0.05959	0.10976
-2.08741	37.3495	0.0081	0.08516	0.14274
-2.29279	37.08272	0.00292	0.05234	0.11532
-2.28616	37.07848	0.00338	0.05598	0.11229
-2.0472	37.11985	0.01482	0.09492	0.12602
-2.05416	37.31852	0.0054	0.06517	0.1394
-1.6011536057	39.6288234536	0.01154	0.09666	0.42956
-1.6811337973	38.3487981432	0.00097	0.03924	0.07033
-1.09	39.15	0.04085	0.07323	0.27665
-2.05557	37.32199	0.0054	0.06517	0.1394
-1.88401	37.35417	0.00497	0.05615	0.11844
-1.98548	37.3012	0.0113	0.08564	0.15828
-3.4111994454	40.2388168396	0.00029	0.00352	0.09841
-1.8511362666	38.2987955044	0.00034	0.03874	0.06156
-1.08824	39.23797	0.05802	0.08304	0.25036
-0.8711235634	38.6888126554	0.0066	0.02015	0.08492
-2.5911885923	40.5188311567	0.00071	0.01885	0.23724
-2.2931	37.08465	0.00292	0.05234	0.11532
-2.0872	37.08821	0.00975	0.08867	0.13698
-2.0903	37.30501	0.0054	0.06517	0.1394
-2.08674	37.08825	0.00975	0.08867	0.13698
-2.05546	37.12653	0.00765	0.08619	0.13733
-2.2711250416	37.0887697756	0.00292	0.05234	0.11532
-2.8311412943	37.4487703722	1E-05	9E-05	0.00183
-3.5211919686	39.6988049417	0.0001	0.00176	0.0363
-3.5311969275	39.9688101688	0.00015	0.00156	0.06915
-3.5311969275	39.9688101688	0.00015	0.00156	0.06915
-3.6412006339	40.0588108039	0.00041	0.00353	0.10038
-3.5311985289	40.0588119625	0.00037	3	0.10213
-3.5312033698	40.3288173927	0.00029	0.00436	0.08215
-3.4111994454	40.2388168396	0.00029	0.00352	0.09841
-3.411201063	40.3288186592	0.00029	0.00595	0.08294
-3.2911941019	40.0688146855	0.00036	0.00442	0.09864
-3.1811951955	40.2488194617	0.00055	0.00694	0.12236
-3.1811935875	40.1588176466	0.00043	0.00445	0.11611
-1.07086	39.86833	0.11012	0.52226	0.75784
-1.0011189753	38.2488031242	0.00164	0.01232	0.04198
-2.0311332659	37.8987864085	0.00017	0.01253	0.03293
-0.9011234986	38.6488115979	0.00614	0.02119	0.07937
-2.3811271252	37.088768676	0.00379	56	0.11221
-3.7312086535	40.408816899	0.00086	0.01661	0.17274
-1.0911339798	39.0588175084	0.02917	0.07112	0.21126
-0.8811222916	38.5988108553	0.00772	0.01742	0.06107
-3.4212112772	40.8788298512	0.00316	0.09533	0.45706
-2.5911885923	40.5188311567	0.00071	0.01885	0.23724
-0.92	38.65	0.00614	0.02119	0.07937
-1.08824	39.23797	0.05802	0.08304	0.25036
-1.08824	39.23797	0.05802	0.08304	0.25036
-1.08824	39.23797	0.05802	0.08304	0.25036
-0.87555	38.60359	0.00772	0.01742	0.06107
-1.88562	37.3528	0.00497	0.05615	0.11844
-2.05786	37.12762	0.00765	0.08619	0.13733
